# Supplementary material for: Genome-wide association study and polygenic score assessment of insulin resistance
Source: Front Endocrinol (Lausanne). 2024 Jun 13;15:1384103. doi: 10.3389/fendo.2024.1384103 (PMC11208314; doi:10.3389/fendo.2024.1384103)
Supplement: Supplementary file 6 [file Table_5.xlsx]

## Sheet: Sup Tab 5
Supplementary Table 5. Replication of previously reported loci associated with HOMA-%B in BMI-unadjusted GWAS of HOMA2-%B in QBB at P < 0.05
		QBB				Effect Allele Frequency
Previously Reported SNPs with genome-wide significant association with HOMA-B	Locus	Lead SNP within ± 250 kb of previously reported SNP	Allele (Effect/other)	P-value	No. of SNPs within ± 250 kb with P < 0.05	QBB	EUR	AFR	EAS	SAS	AMR
rs340874	1q32.3	rs10864084	A/G	1.78x10-3	70	0.93	0.98	0.62	0.88	0.94	0.97
rs1260326	2p23.3	rs13419412	G/A	1.32x10-2	62	0.98	1	0.86	1	1	0.98
rs560887	2q31.1	rs16855893	T/C	1.59x10-4	134	0.94	0.95	0.93	0.57	0.81	0.93
rs13431652	2q24.3	rs16855893	T/C	1.59x10-4	136	0.94	0.95	0.93	0.57	0.81	0.93
rs2943634	2q36.3	rs17831311	C/A	3.71x10-3	20	0.96	0.98	1	1	1	0.98
rs11708067	3q21.1	rs11707746	T/C	6.21x10-6	156	0.79	0.77	0.7	0.98	0.75	0.65
rs2962246	5q11.1	rs10036382	T/C	2.89x10-3	196	0.75	0.74	0.49	0.86	0.79	0.77
rs958444	5q33.2	rs79374294	C/G	1.47x10-4	141	0.98	1	0.96	1	1	0.99
rs10487796	7p21.2	rs10950548	G/A	2.37x10-4	149	0.6	0.54	0.7	0.75	0.62	0.49
rs4607517	7p13	rs117873767	C/T	8.42x10-5	109	0.92	0.97	0.99	1	0.98	0.99
rs11558471	8q24.11	rs150298768	C/T	1.41x10-2	64	0.78	0.81	0.97	0.9	0.84	0.89
rs7034200	9p24.2	rs4333659	A/G	9.00x10-4	60	0.79	0.78	0.59	0.71	0.82	0.79
rs4836906	9q33.2	rs12380432	C/T	1.17x10-3	261	0.63	0.56	0.51	0.7	0.67	0.66
rs4506565	10q25.2	rs546294412	A/T	3.33x10-3	66	0.99	1	1	1	1	1
rs174550	11q12.2	rs17156506	G/A	3.34x10-3	30	0.98	1	0.86	1	0.97	0.99
rs11605924	11p11.2	rs79368845	T/C	5.73x10-3	40	0.98	0.98	1	1	1	0.99
rs7116432	11p13	rs12295452	G/A	2.1x10-3	91	0.97
rs4237723	11p15.3	rs11022339	A/G	1.50x10-3	62	0.8	0.78	0.95	0.44	0.8	0.8
rs10830963	11q14.3	rs10830959	A/G	8.85x10-8	196	0.68	0.71	0.58	0.56	0.63	0.79
rs10777559	12q21.2	rs10859303	G/T	7.20x10-4	99	0.51	0.54	0.7	0.19	0.4	0.58
rs883496	15q12	rs112592354	G/A	1.32x10-3	104	0.98	0.98	1	1	0.99	1
Replication of loci at P < 0.05 based on SNPs within 250kb window of the reported loci. SNP: Single Nucleotide Polymorphism Reported SNP: SNP previously identified and reported by databases. QBB: Qatar Biobank, EUR: Europeans, AFR: Africans, EAS: East Asians, SAS: South Asians, AMR: Admixed Americans
