# Supplementary material for: Genome-wide association study and polygenic score assessment of insulin resistance
Source: Front Endocrinol (Lausanne). 2024 Jun 13;15:1384103. doi: 10.3389/fendo.2024.1384103 (PMC11208314; doi:10.3389/fendo.2024.1384103)
Supplement: Supplementary file 7 [file Table_6.xlsx]

## Sheet: Sup Tab 6
Supplementary Table 6. Replication of previously reported loci associated with HOMA-%B in GWAS of BMI adjusted HOMA2-%B in QBB at P < 0.05
		QBB				Effect Allele Frequency
Previously Reported SNPs with genome-wide significant association with HOMA-B	Locus	Lead SNP within ± 250 kb of previously reported SNP	Allele (Effect/other)	P-value	No. of SNPs within ± 250 kb with P < 0.05	QBB	EUR	AFR	EAS	SAS	AMR
rs340874	1q32.3	rs10864084	A/G	9.80x10-4	143	0.93	0.98	0.62	0.88	0.94	0.97
rs1260326	2p23.3	rs76599449	T/C	4.68x10-3	68	0.99	1	0.96	1	1	1
rs13431652	2q24.3	rs16855893	T/C	2.84x10-4	156	0.94	0.95	0.93	0.57	0.81	0.93
rs560887	2q31.1	rs16855893	T/C	2.84x10-4	153	0.94	0.95	0.93	0.57	0.81	0.93
rs2943634	2q36.3	rs111742842	G/A	4.65x10-3	56	0.98	0.99	1	1	1	0.99
rs11708067	3q21.1	rs11707746	T/C	6.34x10-4	178	0.79	0.77	0.7	0.98	0.75	0.65
rs2962246	5q11.1	rs10036382	T/C	9.10x10-4	163	0.75	0.74	0.49	0.86	0.79	0.77
rs958444	5q33.2	rs79374294	C/G	6.31x10-5	136	0.98	1	0.96	1	1	0.99
rs10487796	7p21.2	rs10950548	G/A	1.05x10-4	162	0.6	0.54	0.7	0.75	0.62	0.49
rs4607517	7p13	rs117873767	C/T	5.72x10-5	102	0.92	0.97	0.99	1	0.98	0.99
rs11558471	8q24.11	rs71530854	C/T	8.71x10-3	36	0.92	0.83	0.98	0.87	0.98	0.92
rs7034200	9p24.2	rs79284250	T/C	1.76x10-3	89	0.97	0.97	1	0.98	0.88	0.89
rs4836906	9q33.2	rs12380432	C/T	1.30x10-3	291	0.63	0.56	0.51	0.7	0.67	0.66
rs10885122	10q25.2	rs7920368	T/C	9.20x10-4	254	0.56	0.62	0.51	0.52	0.57	0.41
rs174550	11q12.2	rs1639890	G/A	8.91x10-3	37	0.98	0.99	0.84	0.98	0.94	0.98
rs11605924	11p11.2	rs79368845	T/C	9.26x10-3	40	0.98	0.98	1	1	1	0.99
rs7116432	11p13	rs1208475463	TA/T	1.64x10-3	89	0.99	-	-	-	-	-
rs4237723	11p15.3	rs80145403	G/A	1.1x10-2	53	0.88	-	-	-	-	-
rs10830963	11q14.3	rs10830959	A/G	2.93x10-8	166	0.68	0.71	0.58	0.56	0.63	0.79
rs10777559	12q21.2	rs10859303	G/T	1.86x10-3	46	0.51	0.54	0.7	0.19	0.4	0.58
rs883496	15q12	rs12901627	C/T	2.59x10-3	101	0.75	0.61	0.98	0.63	0.62	0.76
Replication of loci at P < 0.05 based on SNPs within 250kb window of the reported loci. SNP: Single Nucleotide Polymorphism Reported SNP: SNP Previously identified and reported by databases. QBB: Qatar Biobank, EUR: Europeans, AFR: Africans, EAS: East Asians, SAS: South Asians, AMR: Admixed Americans
